# Supplementary material
Source: PubMed Central journal article supplement (PMC4504106)
Supplement: jcav06p0709s1.pdf [file jcav06p0709s1.pdf]

**Supplemental Table S1.** The frequency distribution of *IL10* gene polymorphisms for DLBCL and FL included in the current meta-analysis

| Surname                                    | Year | Country   | Ethnicity | Source | Genotype method | Subtype | Case |     |    |      | Control |      |     |      |
|--------------------------------------------|------|-----------|-----------|--------|-----------------|---------|------|-----|----|------|---------|------|-----|------|
|                                            |      |           |           |        |                 |         | CC   | CT  | TT | All  | CC      | CT   | TT  | All  |
| <b>-819C&gt;T (rs1800871) polymorphism</b> |      |           |           |        |                 |         |      |     |    |      |         |      |     |      |
| Lech-Maranda                               | 2004 | France    | Caucasian | HB     | PCR-RFLP        | DLBCL   | 107  | 81  | 11 | 199  | 53      | 46   | 13  | 112  |
| Lan                                        | 2006 | USA       | Mixed     | PB     | TaqMan          | DLBCL   | 81   | 67  | 7  | 155  | 329     | 211  | 34  | 574  |
| Lan                                        | 2006 | USA       | Mixed     | PB     | TaqMan          | FL      | 53   | 51  | 5  | 109  | 329     | 211  | 34  | 574  |
| Wang                                       | 2006 | USA       | Mixed     | PB     | TaqMan          | DLBCL   | 187  | 142 | 22 | 351  | 514     | 339  | 81  | 934  |
| Wang                                       | 2006 | USA       | Mixed     | PB     | TaqMan          | FL      | 157  | 94  | 17 | 268  | 514     | 339  | 81  | 934  |
| Lech-Maranda                               | 2007 | France    | Caucasian | HB     | PCR-RFLP        | FL      | 56   | 34  | 10 | 100  | 53      | 46   | 13  | 112  |
| Purdue                                     | 2007 | Australia | Caucasian | PB     | TaqMan          | DLBCL   | 113  | 54  | 5  | 172  | 295     | 170  | 23  | 488  |
| Purdue                                     | 2007 | Australia | Caucasian | PB     | TaqMan          | FL      | 123  | 71  | 9  | 203  | 295     | 170  | 23  | 488  |
| Hosgood                                    | 2013 | Asia      | Asian     | HB     | TaqMan          | DLBCL   | 562  | 469 | 89 | 1120 | 2033    | 1700 | 364 | 4097 |
| Hosgood                                    | 2013 | Asia      | Asian     | HB     | TaqMan          | FL      | 116  | 106 | 30 | 252  | 2033    | 1700 | 364 | 4097 |
| <b>-572C&gt;A (rs1800872) polymorphism</b> |      |           |           |        |                 |         |      |     |    |      |         |      |     |      |
| Lech-Maranda                               | 2004 | France    | Caucasian | HB     | PCR-RFLP        | DLBCL   | 107  | 81  | 11 | 199  | 53      | 46   | 13  | 112  |
| Lan                                        | 2006 | USA       | Mixed     | PB     | TaqMan          | DLBCL   | 82   | 62  | 8  | 152  | 331     | 189  | 43  | 563  |
| Lan                                        | 2006 | USA       | Mixed     | PB     | TaqMan          | FL      | 55   | 44  | 10 | 109  | 331     | 189  | 43  | 563  |
| Wang                                       | 2006 | USA       | Mixed     | PB     | TaqMan          | DLBCL   | 185  | 141 | 22 | 348  | 515     | 342  | 81  | 938  |
| Wang                                       | 2006 | USA       | Mixed     | PB     | TaqMan          | FL      | 155  | 95  | 17 | 267  | 515     | 342  | 81  | 938  |
| Lech-Maranda                               | 2007 | France    | Caucasian | HB     | PCR-RFLP        | FL      | 56   | 34  | 10 | 100  | 53      | 46   | 13  | 112  |
| Purdue                                     | 2007 | Australia | Caucasian | PB     | TaqMan          | DLBCL   | 113  | 54  | 5  | 172  | 297     | 169  | 23  | 489  |
| Purdue                                     | 2007 | Australia | Caucasian | PB     | TaqMan          | FL      | 123  | 72  | 9  | 204  | 297     | 169  | 23  | 489  |
| Hosgood                                    | 2013 | Asia      | Asian     | HB     | TaqMan          | DLBCL   | 566  | 460 | 89 | 1115 | 2041    | 1685 | 362 | 4088 |
| Hosgood                                    | 2013 | Asia      | Asian     | HB     | TaqMan          | FL      | 118  | 104 | 32 | 254  | 2041    | 1685 | 362 | 4088 |

PB, Population based; HB, Hospital based; PCR-RFLP, Polymorphism chain reaction-restriction fragment length polymorphism; DLBCL, Diffuse large B-cell lymphomas; FL, Follicular lymphoma.
